# Supplementary material
Source: PubMed Central journal article supplement (PMC9216615)
Supplement: kxaa037_supplementary_data.pdf [file kxaa037_supplementary_data.pdf]

## 1. IMMUNE CORRELATES ANALYSIS USING VACCINEES FROM TEST NEGATIVE DESIGNS

## SUPPLEMENTARY MATERIALS

1.1 *Derivation of  $P(X|W)$  and accuracy of regression calibration*

In this section we derive  $P(D = 1|w, Z = 1)$  and compare it to the regression calibration approach. We are interested in the effect of the immune response of interest  $X$  on disease  $Y$ , but only see  $W$ . We assume that the probability of being a case (e.g. Ebola virus disease) for a vaccinee is given by

$$P(Y = 1|X, Z = 1) = \frac{\exp(\beta_0 + \beta_1 X)}{1 + \exp(\beta_0 + \beta_1 X)}$$

and the probability of being a control (e.g. non-Ebola virus disease) is given by

$$P(Y = 0|X, Z = 1) = \left(1 - \frac{\exp(\beta_0 + \beta_1 X)}{1 + \exp(\beta_0 + \beta_1 X)}\right) \pi.$$

The probabilities of arriving at the clinic are  $P(A = 1|Y = 1, Z = 1) = \theta_1$ ,  $P(A = 1|Y = 0, Z = 1) = \theta_0$ , for cases and controls, respectively. Define  $D = 1$  if  $Y = 1 \cap A = 1$  and  $D = 0$  if  $Y = 0 \cap A = 1$ . We have

$$P(D = 1|X, Z = 1) = P(Y = 1 \cap A = 1|X, Z = 1) = \frac{\exp(\beta_0 + \beta_1 X)}{1 + \exp(\beta_0 + \beta_1 X)} \theta_1,$$

while the chance of a control arriving is

$$P(D = 0|X, Z = 1) = P(Y = 0 \cap A = 1|X, Z = 1) = \left(1 - \frac{\exp(\beta_0 + \beta_1 X)}{1 + \exp(\beta_0 + \beta_1 X)}\right) \pi \theta_0.$$

We only see vaccinees who arrive, their disease status ( $D = 0$  or  $1$ ) and we measure  $W$ . The

probability that a vaccinee with covariate  $W$  who arrives is a case is given by

$$\begin{aligned}
& P(D = 1|W, D = 1 \cup D = 0, Z = 1) \\
&= \int P(D = 1, X = x|W, D = 1 \cup D = 0, Z = 1)dx \\
&= \int \frac{P(D = 1, X = x, W = w, Z = 1)}{P(W, D = 1 \cup D = 0, Z = 1)}dx \\
&= \frac{\int \frac{\theta_1 \exp(\beta_0 + \beta_1 x)}{1 + \exp(\beta_0 + \beta_1 x)} \phi(x; \mu(w), \tau^2) \phi(w; \mu, \sigma^2) dx}{\int \frac{\pi \theta_0 + \theta_1 \exp(\beta_0 + \beta_1 x)}{1 + \exp(\beta_0 + \beta_1 x)} \phi(x; \mu(w), \tau^2) \phi(w; \mu, \sigma^2) dx} \\
&= \frac{\int \frac{\theta_1 \exp(\beta_0 + \beta_1 x)}{1 + \exp(\beta_0 + \beta_1 x)} \phi(x; \mu(w), \tau^2) dx}{\int \frac{\pi \theta_0 + \theta_1 \exp(\beta_0 + \beta_1 x)}{1 + \exp(\beta_0 + \beta_1 x)} \phi(x; \mu(w), \tau^2) dx} \\
&= \frac{\int \frac{\exp(\beta_0 + \beta_1 x)}{1 + \exp(\beta_0 + \beta_1 x)} \phi(x; \mu(w), \tau^2) dx}{\int \frac{\pi \theta_0 / \theta_1 + \exp(\beta_0 + \beta_1 x)}{1 + \exp(\beta_0 + \beta_1 x)} \phi(x; \mu(w), \tau^2) dx} \\
&= \frac{\int \frac{\exp(\beta_0 + \beta_1 x)}{1 + \exp(\beta_0 + \beta_1 x)} \phi(x; \mu(w), \tau^2) dx}{\int \frac{\pi^* + \exp(\beta_0 + \beta_1 x)}{1 + \exp(\beta_0 + \beta_1 x)} \phi(x; \mu(w), \tau^2) dx} \\
&= \frac{E_{X|w} \left( \frac{\exp(\beta_0 - \log(\pi^*) + \beta_1 X)}{1 + \exp(\beta_0 + \beta_1 X)} \right)}{E_{X|w} \left( \frac{1}{1 + \exp(\beta_0 + \beta_1 X)} \right) + E_{X|w} \left( \frac{\exp(\beta_0 - \log(\pi^*) + \beta_1 X)}{1 + \exp(\beta_0 + \beta_1 X)} \right)} \\
&= p(w; \beta_0, \beta_1, \pi^*),
\end{aligned}$$

where  $\phi(x; \mu(x), \tau^2)$  is the conditional distribution of  $X|w$ ,  $\phi(w; \mu, \sigma^2)$  the marginal distribution of  $W$ ,  $\pi^* = \pi \theta_0 / \theta_1$ , and the expectation is with respect to the conditional distribution of  $X|w$ .

To evaluate the accuracy of regression calibration, we assume that  $X, W$  are bivariate normal with common mean 3.00 and common standard deviation 0.50 which allows us to evaluate  $E_{X|w}(\cdot)$ . Figure 1 graphs the true curve,  $p(w; \beta_0, \beta_1, \pi^*)$ , vs the regression calibration curve,  $\exp(\beta_0^{**} + \beta_1 E(X|w)) / [1 + \exp\{\beta_0^{**} + \beta_1 E(X|w)\}]$ , where  $\beta_0^{**}$  best approximates  $p(w; \beta_0, \beta_1, \pi^*)$  for  $\rho = 0.90$  and 0.20. Clearly, regression calibration provides an excellent approximation for both values of  $\rho$ .

We note that if  $\rho = 1$  so that  $W = X$  then

$$p(w; \beta_0, \beta_1, \pi^*) = \frac{\exp\{\beta_0 - \log(\pi^*) + \beta_1 x\}}{1 + \exp\{\beta_0 - \log(\pi^*) + \beta_1 x\}}$$

and  $\beta_0$  cannot be determined. Thus the model is unidentifiable for  $\rho = 1$ . Since it is hard to

see how an unidentifiable model can be made identifiable by introducing noise, i.e. replacing  $X$  with  $W|X$ , the model seems unidentifiable in general. Admittedly, this is not really a proof of unidentifiability.

We also note that if  $\theta_1 = \theta_0 = \pi = 1.00$  and  $\pi^* = 1$  we obtain  $p(w; \beta_0, \beta_1, 1)$  which becomes

$$P(D = 1|W, D = 1 \cup D = 0, Z = 1) = E_{X|w} \left( \frac{\exp(\beta_0 + \beta_1 X)}{1 + \exp(\beta_0 + \beta_1 X)} \right).$$

This corresponds to an (identifiable) prospective model for  $P(Y = 1|W, Z = 1)$  with no missing data.

### 1.2 Graphical Representation of the six scenarios

To help understand the scenarios, Figure 2 provides the hazards for the case disease (solid curves) at  $X(t) = 2.5$  and  $X(t) = 4.0$  and for the control disease (dashed curves) as a function of time since study start. Scenarios 3-6 have non-constant and dissimilar hazards for the case and control diseases. Also graphed, as ticks at  $D = 0$  and 1, are the arrival times of the symptomatic vaccinees for the last simulated dataset. For scenario six,  $\lambda_1(t)/\lambda_0(t)$  at  $t/T = .90$  divided by the same ratio at  $t/T = .10$  is 1/9. Thus during follow-up there is an extreme decrease in the number of cases relative to controls as in an imploding outbreak. The analogous ratios for scenarios 3, 4, and 5 are 3, 1/3, and 9, respectively.

### 1.3 Additional simulations including the maximum likelihood estimator

In this subsection, we provide a more extensive set of simulations to evaluate different methods of estimation. We use the setup of section 3 but evaluate sample sizes 1/10th, 1, and 10 times that of section 3. We evaluate the three approaches described in section 3 as well as two maximum likelihood estimators which we explain below.

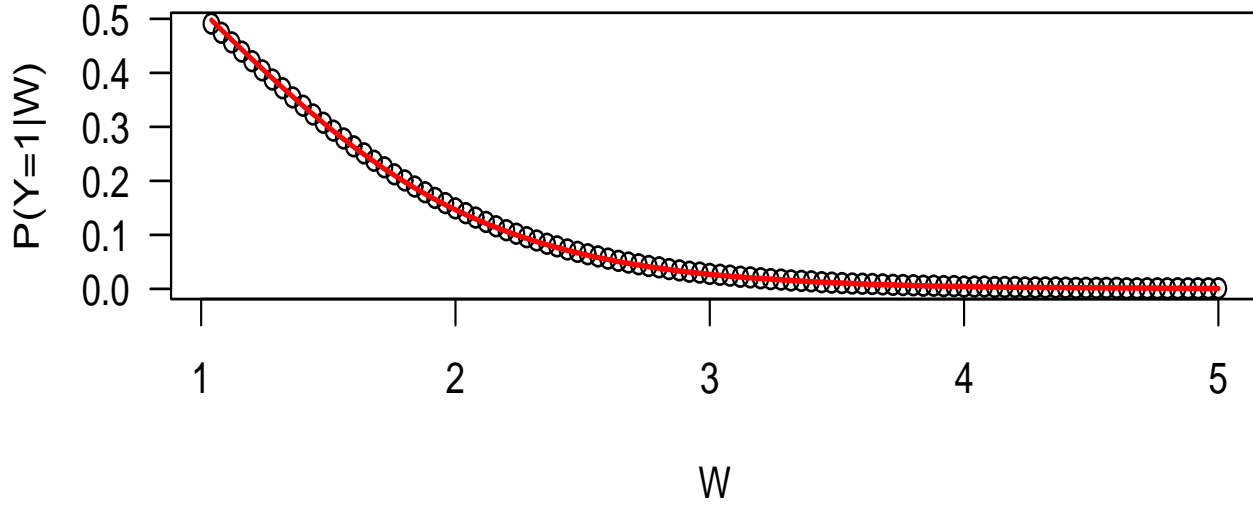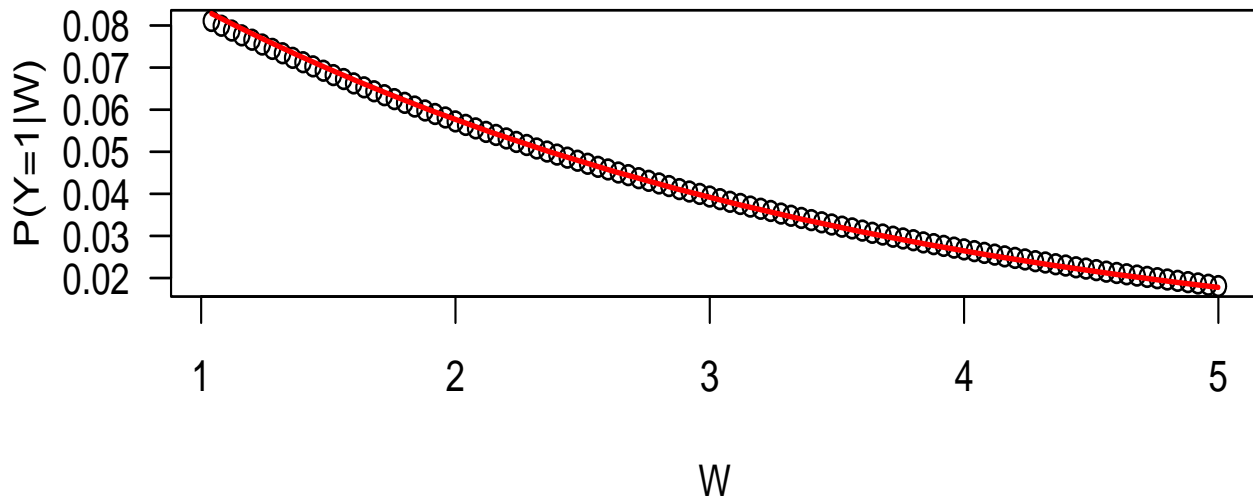

Fig. 1. The true risk curve  $P(D = 1|w) = p(w; \beta_0, \beta_1, \pi^*)$  (black dots) and regression calibration curve, logit  $p(D = 1|w) = \beta_0^{**} + \beta_1 E(X|w)$  (red line) curves. Here  $(\beta_0, \beta_1, \pi^*) = (-2.11, -2.03, 0.10)$  and  $\beta_0^{**}$  is the best fitting (by eye) curve to  $P(D = 1|w)$ . We evaluate  $\rho = 0.90$  (top panel) and  $\rho = 0.20$  (bottom panel). Here  $W, X$  are bivariate normal with common mean 3 and common standard deviation .5.

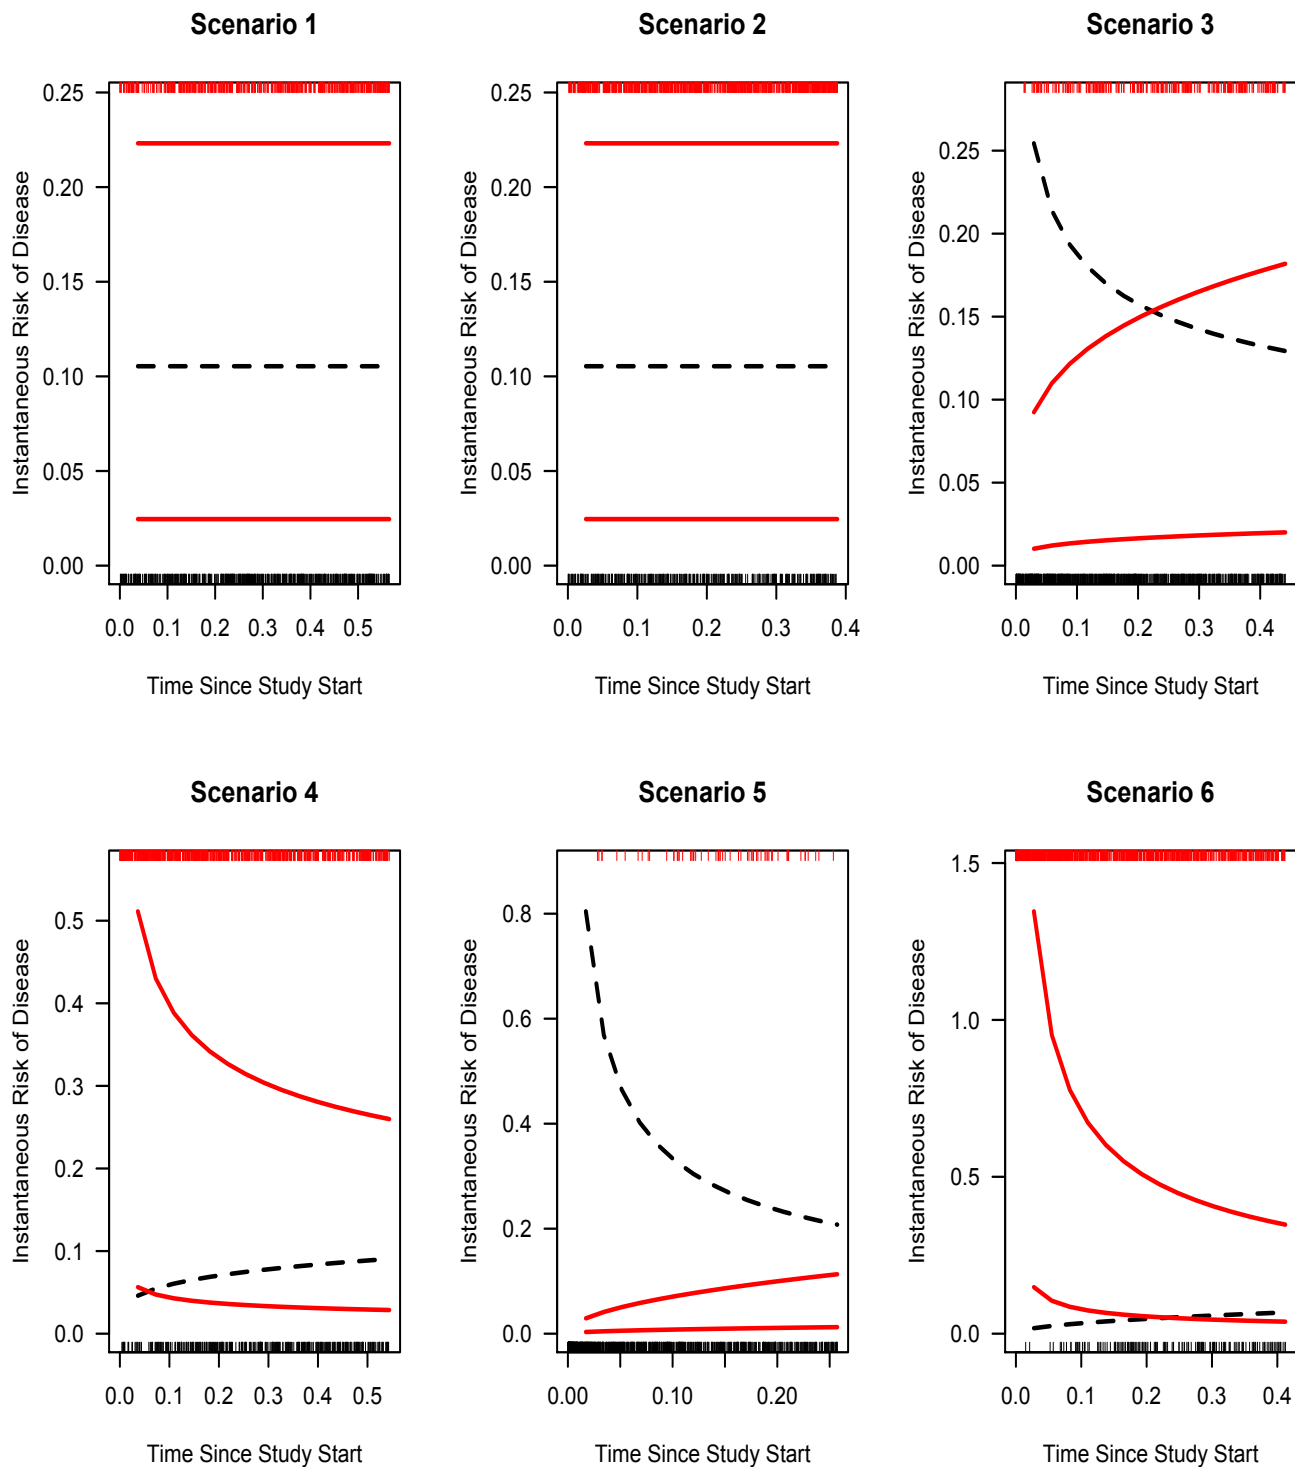

Fig. 2. Hazards of case disease at  $X(t) = 4.0$  and  $X(t) = 2.5$  (solid curves) and control disease (dashed curve) for the six scenarios. The first two scenarios have  $(\alpha_0, \alpha_1) = (1, 1)$  while the last four have  $\alpha_0, \alpha_1 = (1.25, 0.75)$ ,  $(0.75, 1.25)$ ,  $(1.50, 0.50)$  and  $(0.50, 1.50)$ . The arrival times are given by ticks, for cases ( $D=1$ ) and controls ( $D=0$ ), for the last simulated dataset of each scenario. Red denotes the case disease while black denotes the control disease.

In the previous subsection we showed that

$$P(D = 1|w, Z = 1) = p(w; \beta_0, \beta_1, \pi^*)$$

The proper likelihood based on data  $(D_i, W_i), i = 1, \dots, n$  is therefore

$$L(\beta_0, \beta_1, \pi^*) = \prod_i p(W_i; \beta_0, \beta_1, \pi^*)^{D_i} \{1 - p(W_i; \beta_0, \beta_1, \pi^*)\}^{1-D_i}.$$

We consider two mles, the first maximizes  $L(\beta_0, \beta_1, \pi^*)$  while the second sets  $\pi^*$  to its true value of 0.01 and maximizes  $L(\beta_0, \beta_1, 0.01)$ . We do this as a reference approach because when  $\rho = 1$ ,  $p(w; \beta_0, \beta_1, \pi^*)$  is only identifiable for  $\beta_1$ .

As for regression calibration, we discard the known  $X$ s in the controls for whom  $X$  is known. If one uses actual the  $X$ s for the controls, the mle of  $\beta_1$  is substantially biased towards zero. This makes sense as we observed substantial bias towards zero of the estimate of  $\beta_1$  when using  $X$  in the controls for regression calibration and as shown in the previous section, the derived  $P(Y|w)$  is virtually identical to the regression calibration  $P(Y)$  for the parameters used in our simulations.

Interestingly, when we set  $\pi = 1$  and  $\theta_1 = \theta_0 = 1$  and use  $\pi^* = 1$  as known, we have defined a standard prospective study with no missing data. In this case, at least in limited simulations, the asymmetric use of  $P(Y = 1|X, Z = 1) = \exp(\beta_0 + \beta_1 X) / \{1 + \exp(\beta_0 + \beta_1 X)\}$  in controls, and  $P(Y = 1|W, Z = 1) = p(w; \beta_0, \beta_1, 1)$  in cases does not produce a biased estimate and has similar performance to regression calibration.

As in section 3, we generate  $X, W$  as bivariate normal with mean 3.00, standard deviation 0.50 and set  $\rho = 0.40, 0.70$ , and 1.00. We generate  $Y = 0, 1, 2$  for both vaccinated subjects ( $Z=1$ ) and unvaccinated subjects ( $Z = 0$ ) as

$$P(Y = 1|Z, X) = \frac{\exp\{\beta_0 + \beta_1 X + \beta_2(1 - Z)\}}{1 + \exp\{\beta_0 + \beta_1 X + \beta_2(1 - Z)\}}$$

and generate  $Y = 0$  as

$$P(Y = 0|Z, X) = \left(1 - \frac{\exp\{\beta_0 + \beta_1 X + \beta_2(1 - Z)\}}{1 + \exp\{\beta_0 + \beta_1 X + \beta_2(1 - Z)\}}\right) \pi.$$

For the unvaccinated, we set  $X = 0$ . We set  $(\beta_0, \beta_1, \beta_2)$  as  $(-5.51, 0.00, 0.92)$ ,  $(-4.05, -0.60, -0.54)$ ,  $(-1.12, -1.81, -3.47)$ , and set  $\pi = .01$ . We set the arrival probabilities  $P(A = 1|Z = 1, Y = 1) = P(A = 1|Z = 1, Y = 0) = P(A = 1|Z = 0, Y = 1) = P(A = 1|Z = 0, Y = 0) = 0.50$ . We vary  $N$  as 15000, 150000, and 1500000.

In addition to the summaries we report in section 3, we additionally report the vaccine efficacy as a function of the quartiles of  $X$ . Under the assumptions of the test negative design, and the assumption that the counterfactual  $X$  that would've been realized, had the unvaccinated been vaccinated, has no effect on risk in the unvaccinated, the VE is given by

$$\text{VE}_X(q) = 1 - \exp\{\beta_1 X(q) - \beta_2\},$$

where  $X(q)$  is the  $x$  corresponding to the  $q$ th percentile of the distribution of  $X$ . We provide

$$\text{VE}_V\left(\frac{o}{8}\right)$$

for  $V = X, \widehat{X}(W)$ , and  $W$ , and for  $o = 1$  and  $7$ .

Table 1. Use of  $W$  as IR with  $n=15000, 150000, 1500000$ .

| scen | $\beta_1$ | $\rho$ | imp   | $\widehat{\beta}_1$ | $S^2(\widehat{\beta}_1)$ | % Reject | $\overline{VE}(\frac{1}{8})$ | $\overline{VE}(\frac{7}{8})$ | $\bar{n}_V$ | $\bar{n}_{VD}$ | $\bar{n}_{VU}$ |
|------|-----------|--------|-------|---------------------|--------------------------|----------|------------------------------|------------------------------|-------------|----------------|----------------|
| 1    | 0.000     | 1.000  | 0.000 | -0.002              | 0.217                    | 0.048    | 0.584                        | 0.588                        | 105         | 30             | 149            |
| 2    | -0.600    | 1.000  | 0.000 | -0.612              | 0.291                    | 0.177    | 0.578                        | 0.781                        | 97          | 22             | 148            |
| 3    | -1.810    | 1.000  | 0.000 | -1.906              | 0.524                    | 0.753    | 0.562                        | 0.941                        | 90          | 16             | 149            |
| 4    | 0.000     | 0.700  | 0.000 | 0.003               | 0.213                    | 0.052    | 0.581                        | 0.585                        | 104         | 30             | 149            |
| 5    | -0.600    | 0.700  | 0.000 | -0.442              | 0.288                    | 0.123    | 0.611                        | 0.759                        | 97          | 22             | 149            |
| 6    | -1.810    | 0.700  | 0.000 | -1.345              | 0.454                    | 0.483    | 0.617                        | 0.907                        | 90          | 16             | 149            |
| 7    | 0.000     | 0.400  | 0.000 | 0.021               | 0.211                    | 0.049    | 0.587                        | 0.579                        | 105         | 30             | 148            |
| 8    | -0.600    | 0.400  | 0.000 | -0.268              | 0.273                    | 0.084    | 0.639                        | 0.732                        | 97          | 22             | 149            |
| 9    | -1.810    | 0.400  | 0.000 | -0.765              | 0.413                    | 0.207    | 0.681                        | 0.858                        | 90          | 15             | 149            |
|      |           |        |       |                     |                          |          |                              |                              |             |                |                |
| 1    | 0.000     | 1.000  | 0.000 | 0.001               | 0.020                    | 0.061    | 0.598                        | 0.597                        | 1049        | 302            | 1493           |
| 2    | -0.600    | 1.000  | 0.000 | -0.602              | 0.023                    | 0.976    | 0.595                        | 0.797                        | 972         | 225            | 1493           |
| 3    | -1.810    | 1.000  | 0.000 | -1.821              | 0.040                    | 1.000    | 0.596                        | 0.949                        | 909         | 161            | 1492           |
| 4    | 0.000     | 0.700  | 0.000 | -0.000              | 0.020                    | 0.052    | 0.598                        | 0.598                        | 1049        | 302            | 1494           |
| 5    | -0.600    | 0.700  | 0.000 | -0.421              | 0.024                    | 0.772    | 0.628                        | 0.770                        | 971         | 224            | 1492           |
| 6    | -1.810    | 0.700  | 0.000 | -1.286              | 0.035                    | 1.000    | 0.637                        | 0.916                        | 908         | 160            | 1492           |
| 7    | 0.000     | 0.400  | 0.000 | 0.006               | 0.019                    | 0.050    | 0.598                        | 0.595                        | 1049        | 302            | 1493           |
| 8    | -0.600    | 0.400  | 0.000 | -0.243              | 0.024                    | 0.338    | 0.662                        | 0.744                        | 972         | 224            | 1491           |
| 9    | -1.810    | 0.400  | 0.000 | -0.720              | 0.030                    | 0.986    | 0.697                        | 0.867                        | 910         | 160            | 1494           |
|      |           |        |       |                     |                          |          |                              |                              |             |                |                |
| 1    | 0.000     | 1.000  | 0.000 | 0.001               | 0.002                    | 0.045    | 0.600                        | 0.599                        | 10491       | 3021           | 14926          |
| 2    | -0.600    | 1.000  | 0.000 | -0.599              | 0.002                    | 1.000    | 0.597                        | 0.798                        | 9732        | 2254           | 14926          |
| 3    | -1.810    | 1.000  | 0.000 | -1.814              | 0.004                    | 1.000    | 0.600                        | 0.950                        | 9094        | 1606           | 14920          |
| 4    | 0.000     | 0.700  | 0.000 | -0.000              | 0.002                    | 0.055    | 0.599                        | 0.599                        | 10492       | 3021           | 14926          |
| 5    | -0.600    | 0.700  | 0.000 | -0.418              | 0.002                    | 1.000    | 0.629                        | 0.771                        | 9731        | 2252           | 14926          |
| 6    | -1.810    | 0.700  | 0.000 | -1.263              | 0.003                    | 1.000    | 0.640                        | 0.916                        | 9092        | 1607           | 14923          |
| 7    | 0.000     | 0.400  | 0.000 | -0.000              | 0.002                    | 0.040    | 0.599                        | 0.599                        | 10490       | 3022           | 14919          |
| 8    | -0.600    | 0.400  | 0.000 | -0.239              | 0.002                    | 0.999    | 0.661                        | 0.742                        | 9731        | 2249           | 14918          |
| 9    | -1.810    | 0.400  | 0.000 | -0.723              | 0.003                    | 1.000    | 0.698                        | 0.869                        | 9091        | 1606           | 14929          |



Table 2. Use of  $\widehat{X}(W)$  as IR with n=15000, 150000, 1500000.

| scen | $\beta_1$ | $\rho$ | imp   | $\widehat{\beta}_1$ | $S^2(\widehat{\beta}_1)$ | % Reject | $\overline{VE}(\frac{1}{8})$ | $\overline{VE}(\frac{7}{8})$ | $\bar{n}_V$ | $\bar{n}_{VD}$ | $\bar{n}_{VU}$ |
|------|-----------|--------|-------|---------------------|--------------------------|----------|------------------------------|------------------------------|-------------|----------------|----------------|
| 1    | 0.000     | 1.000  | 1.000 | -0.002              | 0.217                    | 0.048    | 0.584                        | 0.588                        | 105         | 30             | 149            |
| 2    | -0.600    | 1.000  | 1.000 | -0.612              | 0.291                    | 0.177    | 0.578                        | 0.781                        | 97          | 22             | 148            |
| 3    | -1.810    | 1.000  | 1.000 | -1.906              | 0.524                    | 0.753    | 0.562                        | 0.941                        | 90          | 16             | 149            |
| 4    | 0.000     | 0.700  | 1.000 | 0.007               | 0.463                    | 0.052    | 0.581                        | 0.585                        | 104         | 30             | 149            |
| 5    | -0.600    | 0.700  | 1.000 | -0.641              | 0.639                    | 0.117    | 0.611                        | 0.759                        | 97          | 22             | 149            |
| 6    | -1.810    | 0.700  | 1.000 | -1.960              | 1.047                    | 0.450    | 0.617                        | 0.907                        | 90          | 16             | 149            |
| 7    | 0.000     | 0.400  | 1.000 | 0.044               | 1.903                    | 0.040    | 0.587                        | 0.579                        | 105         | 30             | 148            |
| 8    | -0.600    | 0.400  | 1.000 | -0.717              | 2.310                    | 0.079    | 0.639                        | 0.732                        | 97          | 22             | 149            |
| 9    | -1.810    | 0.400  | 1.000 | -1.374              | 548.190                  | 0.001    | 0.681                        | 0.858                        | 90          | 15             | 149            |
|      |           |        |       |                     |                          |          |                              |                              |             |                |                |
| 1    | 0.000     | 1.000  | 1.000 | 0.001               | 0.020                    | 0.061    | 0.598                        | 0.597                        | 1049        | 302            | 1493           |
| 2    | -0.600    | 1.000  | 1.000 | -0.602              | 0.023                    | 0.976    | 0.595                        | 0.797                        | 972         | 225            | 1493           |
| 3    | -1.810    | 1.000  | 1.000 | -1.821              | 0.040                    | 1.000    | 0.596                        | 0.949                        | 909         | 161            | 1492           |
| 4    | 0.000     | 0.700  | 1.000 | -0.000              | 0.042                    | 0.050    | 0.598                        | 0.598                        | 1049        | 302            | 1494           |
| 5    | -0.600    | 0.700  | 1.000 | -0.600              | 0.049                    | 0.769    | 0.628                        | 0.770                        | 971         | 224            | 1492           |
| 6    | -1.810    | 0.700  | 1.000 | -1.843              | 0.077                    | 1.000    | 0.637                        | 0.916                        | 908         | 160            | 1492           |
| 7    | 0.000     | 0.400  | 1.000 | 0.016               | 0.125                    | 0.049    | 0.598                        | 0.595                        | 1049        | 302            | 1493           |
| 8    | -0.600    | 0.400  | 1.000 | -0.609              | 0.155                    | 0.338    | 0.662                        | 0.744                        | 972         | 224            | 1491           |
| 9    | -1.810    | 0.400  | 1.000 | -1.821              | 0.217                    | 0.979    | 0.697                        | 0.867                        | 910         | 160            | 1494           |
|      |           |        |       |                     |                          |          |                              |                              |             |                |                |
| 1    | 0.000     | 1.000  | 1.000 | 0.001               | 0.002                    | 0.045    | 0.600                        | 0.599                        | 10491       | 3021           | 14926          |
| 2    | -0.600    | 1.000  | 1.000 | -0.599              | 0.002                    | 1.000    | 0.597                        | 0.798                        | 9732        | 2254           | 14926          |
| 3    | -1.810    | 1.000  | 1.000 | -1.814              | 0.004                    | 1.000    | 0.600                        | 0.950                        | 9094        | 1606           | 14920          |
| 4    | 0.000     | 0.700  | 1.000 | -0.001              | 0.004                    | 0.056    | 0.599                        | 0.599                        | 10492       | 3021           | 14926          |
| 5    | -0.600    | 0.700  | 1.000 | -0.598              | 0.005                    | 1.000    | 0.629                        | 0.771                        | 9731        | 2252           | 14926          |
| 6    | -1.810    | 0.700  | 1.000 | -1.807              | 0.007                    | 1.000    | 0.640                        | 0.916                        | 9092        | 1607           | 14923          |
| 7    | 0.000     | 0.400  | 1.000 | -0.001              | 0.011                    | 0.042    | 0.599                        | 0.599                        | 10490       | 3022           | 14919          |
| 8    | -0.600    | 0.400  | 1.000 | -0.597              | 0.014                    | 0.999    | 0.661                        | 0.742                        | 9731        | 2249           | 14918          |
| 9    | -1.810    | 0.400  | 1.000 | -1.814              | 0.025                    | 1.000    | 0.698                        | 0.869                        | 9091        | 1606           | 14929          |

Table 3. Use of  $\widehat{X}(W)$  as IR with  $n=150000$  and  $\theta_0 = \theta_{U0} = 0.25$  rather than 0.50 (first third of table),  $\theta_{U0} = 0.25$  instead of 0.50 (second third of table), and  $\pi$  for unvaccinated equal 0.025 rather than 0.01 (last third of table).

| scen | $\beta_1$ | $\rho$ | imp   | $\widehat{\beta}_1$ | $S^2(\widehat{\beta}_1)$ | % Reject | $\overline{VE}(\frac{1}{8})$ | $\overline{VE}(\frac{7}{8})$ | $\bar{n}_V$ | $\bar{n}_{VD}$ | $\bar{n}_{VU}$ |
|------|-----------|--------|-------|---------------------|--------------------------|----------|------------------------------|------------------------------|-------------|----------------|----------------|
| 1    | 0.000     | 1.000  | 1.000 | 0.000               | 0.025                    | 0.050    | 0.597                        | 0.597                        | 676         | 302            | 1121           |
| 2    | -0.600    | 1.000  | 1.000 | -0.605              | 0.030                    | 0.950    | 0.592                        | 0.796                        | 599         | 225            | 1121           |
| 3    | -1.810    | 1.000  | 1.000 | -1.822              | 0.051                    | 1.000    | 0.593                        | 0.949                        | 534         | 161            | 1120           |
| 4    | 0.000     | 0.700  | 1.000 | -0.003              | 0.055                    | 0.047    | 0.596                        | 0.598                        | 676         | 302            | 1122           |
| 5    | -0.600    | 0.700  | 1.000 | -0.608              | 0.061                    | 0.664    | 0.626                        | 0.770                        | 597         | 224            | 1121           |
| 6    | -1.810    | 0.700  | 1.000 | -1.851              | 0.098                    | 1.000    | 0.635                        | 0.916                        | 534         | 160            | 1121           |
| 7    | 0.000     | 0.400  | 1.000 | 0.016               | 0.155                    | 0.046    | 0.597                        | 0.594                        | 675         | 302            | 1121           |
| 8    | -0.600    | 0.400  | 1.000 | -0.619              | 0.201                    | 0.259    | 0.660                        | 0.743                        | 597         | 224            | 1120           |
| 9    | -1.810    | 0.400  | 1.000 | -1.828              | 0.276                    | 0.945    | 0.696                        | 0.866                        | 535         | 160            | 1121           |
|      |           |        |       |                     |                          |          |                              |                              |             |                |                |
| 1    | 0.000     | 1.000  | 1.000 | 0.000               | 0.025                    | 0.050    | 0.195                        | 0.194                        | 676         | 302            | 1493           |
| 2    | -0.600    | 1.000  | 1.000 | -0.605              | 0.030                    | 0.950    | 0.185                        | 0.592                        | 599         | 225            | 1493           |
| 3    | -1.810    | 1.000  | 1.000 | -1.822              | 0.051                    | 1.000    | 0.184                        | 0.897                        | 534         | 161            | 1492           |
| 4    | 0.000     | 0.700  | 1.000 | -0.003              | 0.055                    | 0.047    | 0.194                        | 0.197                        | 676         | 302            | 1494           |
| 5    | -0.600    | 0.700  | 1.000 | -0.608              | 0.061                    | 0.664    | 0.250                        | 0.538                        | 597         | 224            | 1492           |
| 6    | -1.810    | 0.700  | 1.000 | -1.851              | 0.098                    | 1.000    | 0.270                        | 0.832                        | 534         | 160            | 1492           |
| 7    | 0.000     | 0.400  | 1.000 | 0.016               | 0.155                    | 0.046    | 0.193                        | 0.188                        | 675         | 302            | 1493           |
| 8    | -0.600    | 0.400  | 1.000 | -0.619              | 0.201                    | 0.259    | 0.321                        | 0.485                        | 597         | 224            | 1491           |
| 9    | -1.810    | 0.400  | 1.000 | -1.828              | 0.276                    | 0.945    | 0.391                        | 0.732                        | 535         | 160            | 1494           |
|      |           |        |       |                     |                          |          |                              |                              |             |                |                |
| 1    | 0.000     | 1.000  | 1.000 | 0.001               | 0.020                    | 0.061    | -0.005                       | -0.006                       | 1049        | 302            | 2606           |
| 2    | -0.600    | 1.000  | 1.000 | -0.602              | 0.023                    | 0.976    | -0.013                       | 0.492                        | 972         | 225            | 2607           |
| 3    | -1.810    | 1.000  | 1.000 | -1.821              | 0.040                    | 1.000    | -0.011                       | 0.873                        | 909         | 161            | 2605           |
| 4    | 0.000     | 0.700  | 1.000 | -0.000              | 0.042                    | 0.050    | -0.005                       | -0.005                       | 1049        | 302            | 2608           |
| 5    | -0.600    | 0.700  | 1.000 | -0.600              | 0.049                    | 0.769    | 0.070                        | 0.425                        | 971         | 224            | 2604           |
| 6    | -1.810    | 0.700  | 1.000 | -1.843              | 0.077                    | 1.000    | 0.093                        | 0.790                        | 908         | 160            | 2605           |
| 7    | 0.000     | 0.400  | 1.000 | 0.016               | 0.125                    | 0.049    | -0.005                       | -0.011                       | 1049        | 302            | 2606           |
| 8    | -0.600    | 0.400  | 1.000 | -0.609              | 0.155                    | 0.338    | 0.153                        | 0.358                        | 972         | 224            | 2605           |
| 9    | -1.810    | 0.400  | 1.000 | -1.821              | 0.217                    | 0.979    | 0.243                        | 0.667                        | 910         | 160            | 2609           |

Table 4. Maximum likelihood over  $\beta_0, \beta_1$  with  $\pi$  set at its true value

| scen | $\beta_1$ | $\rho$ | imp   | $\widehat{\beta}_1$ | $S^2(\widehat{\beta}_1)$ | % Reject | $\overline{\text{VE}}(\frac{1}{8})$ | $\overline{\text{VE}}(\frac{7}{8})$ | $\bar{n}_V$ | $\bar{n}_{VD}$ | $\bar{n}_{VU}$ |
|------|-----------|--------|-------|---------------------|--------------------------|----------|-------------------------------------|-------------------------------------|-------------|----------------|----------------|
| 1    | 0.000     | 1.000  | 2.000 | -0.002              | 0.217                    | 0.049    | 0.996                               | 0.996                               | 105         | 30             | 149            |
| 2    | -0.600    | 1.000  | 2.000 | -0.612              | 0.291                    | 0.176    | 0.996                               | 0.998                               | 97          | 22             | 148            |
| 3    | -1.810    | 1.000  | 2.000 | -1.907              | 0.525                    | 0.753    | 0.996                               | 0.999                               | 90          | 16             | 149            |
| 4    | 0.000     | 0.700  | 2.000 | 0.005               | 0.467                    | 0.052    | 0.996                               | 0.996                               | 104         | 30             | 149            |
| 5    | -0.600    | 0.700  | 2.000 | -0.645              | 0.645                    | 0.118    | 0.996                               | 0.998                               | 97          | 22             | 149            |
| 6    | -1.810    | 0.700  | 2.000 | -2.752              | 620.490                  | 0.001    | 0.996                               | 0.999                               | 90          | 16             | 149            |
| 7    | 0.000     | 0.400  | 2.000 | -2.619              | 7115.016                 | 0.001    | 0.996                               | 0.996                               | 105         | 30             | 148            |
| 8    | -0.600    | 0.400  | 2.000 | -5.963              | 9856.639                 | 0.003    | 0.996                               | 0.998                               | 97          | 22             | 149            |
| 9    | -1.810    | 0.400  | 2.000 | -18.942             | 33284.757                | 0.009    | 0.996                               | 0.999                               | 90          | 15             | 149            |
| 1    | 0.000     | 1.000  | 2.000 | 0.001               | 0.020                    | 0.061    | 0.996                               | 0.996                               | 1049        | 302            | 1493           |
| 2    | -0.600    | 1.000  | 2.000 | -0.602              | 0.023                    | 0.976    | 0.996                               | 0.998                               | 972         | 225            | 1493           |
| 3    | -1.810    | 1.000  | 2.000 | -1.822              | 0.041                    | 1.000    | 0.996                               | 0.999                               | 909         | 161            | 1492           |
| 4    | 0.000     | 0.700  | 2.000 | -0.000              | 0.042                    | 0.050    | 0.996                               | 0.996                               | 1049        | 302            | 1494           |
| 5    | -0.600    | 0.700  | 2.000 | -0.601              | 0.049                    | 0.769    | 0.996                               | 0.998                               | 971         | 224            | 1492           |
| 6    | -1.810    | 0.700  | 2.000 | -1.849              | 0.078                    | 1.000    | 0.996                               | 0.999                               | 908         | 160            | 1492           |
| 7    | 0.000     | 0.400  | 2.000 | 0.006               | 0.142                    | 0.043    | 0.996                               | 0.996                               | 1049        | 302            | 1493           |
| 8    | -0.600    | 0.400  | 2.000 | -0.612              | 0.159                    | 0.329    | 0.996                               | 0.998                               | 972         | 224            | 1491           |
| 9    | -1.810    | 0.400  | 2.000 | -1.830              | 0.220                    | 0.980    | 0.996                               | 0.999                               | 910         | 160            | 1494           |
| 1    | 0.000     | 1.000  | 2.000 | 0.001               | 0.002                    | 0.048    | 0.996                               | 0.996                               | 10491       | 3021           | 14926          |
| 2    | -0.600    | 1.000  | 2.000 | -0.599              | 0.002                    | 1.000    | 0.996                               | 0.998                               | 9732        | 2254           | 14926          |
| 3    | -1.810    | 1.000  | 2.000 | -1.814              | 0.004                    | 1.000    | 0.996                               | 1.000                               | 9094        | 1606           | 14920          |
| 4    | 0.000     | 0.700  | 2.000 | -0.010              | 0.021                    | 0.005    | 0.996                               | 0.996                               | 10492       | 3021           | 14926          |
| 5    | -0.600    | 0.700  | 2.000 | -0.598              | 0.005                    | 1.000    | 0.996                               | 0.998                               | 9731        | 2252           | 14926          |
| 6    | -1.810    | 0.700  | 2.000 | -1.811              | 0.007                    | 1.000    | 0.996                               | 0.999                               | 9092        | 1607           | 14923          |
| 7    | 0.000     | 0.400  | 2.000 | -0.001              | 0.011                    | 0.043    | 0.996                               | 0.996                               | 10490       | 3022           | 14919          |
| 8    | -0.600    | 0.400  | 2.000 | -0.603              | 0.022                    | 0.995    | 0.996                               | 0.998                               | 9731        | 2249           | 14918          |
| 9    | -1.810    | 0.400  | 2.000 | -1.820              | 0.026                    | 1.000    | 0.996                               | 0.999                               | 9091        | 1606           | 14929          |

Table 5. Maximum likelihood over  $\beta_0, \beta_1, \pi$ 

| scen | $\beta_1$ | $\rho$ | imp   | $\widehat{\beta}_1$ | $S^2(\widehat{\beta}_1)$ | % Reject | $\overline{VE}(\frac{1}{8})$ | $\overline{VE}(\frac{7}{8})$ | $\bar{n}_V$ | $\bar{n}_{VD}$ | $\bar{n}_{VU}$ |
|------|-----------|--------|-------|---------------------|--------------------------|----------|------------------------------|------------------------------|-------------|----------------|----------------|
| 1    | 0.000     | 1.000  | 2.000 | -0.002              | 0.217                    | 0.048    | 0.722                        | 0.708                        | 105         | 30             | 149            |
| 2    | -0.600    | 1.000  | 2.000 | -0.612              | 0.291                    | 0.177    | 0.746                        | 0.863                        | 97          | 22             | 148            |
| 3    | -1.810    | 1.000  | 2.000 | -1.906              | 0.524                    | 0.753    | 0.835                        | 0.973                        | 90          | 16             | 149            |
| 4    | 0.000     | 0.700  | 2.000 | 0.008               | 0.499                    | 0.053    | 0.723                        | 0.699                        | 104         | 30             | 149            |
| 5    | -0.600    | 0.700  | 2.000 | -0.672              | 0.754                    | 0.112    | 0.736                        | 0.864                        | 97          | 22             | 149            |
| 6    | -1.810    | 0.700  | 2.000 | -3.744              | 1135.734                 | 0.002    | 0.710                        | 0.965                        | 90          | 16             | 149            |
| 7    | 0.000     | 0.400  | 2.000 | -2.054              | 4281.964                 | 0        | -13620*                      | -12108*                      | 105         | 30             | 148            |
| 8    | -0.600    | 0.400  | 2.000 | -7.535              | 5305.414                 | 0        | -12707*                      | -13162*                      | 97          | 22             | 149            |
| 9    | -1.810    | 0.400  | 2.000 | -43.459             | 32840.794                | 0.055    | -124692*                     | 0.942                        | 90          | 15             | 149            |
| 1    | 0.000     | 1.000  | 2.000 | 0.001               | 0.020                    | 0.061    | 0.723                        | 0.721                        | 1049        | 302            | 1493           |
| 2    | -0.600    | 1.000  | 2.000 | -0.602              | 0.023                    | 0.976    | 0.762                        | 0.881                        | 972         | 225            | 1493           |
| 3    | -1.810    | 1.000  | 2.000 | -1.821              | 0.040                    | 1.000    | 0.872                        | 0.983                        | 909         | 161            | 1492           |
| 4    | 0.000     | 0.700  | 2.000 | -0.000              | 0.042                    | 0.050    | 0.724                        | 0.722                        | 1049        | 302            | 1494           |
| 5    | -0.600    | 0.700  | 2.000 | -0.606              | 0.051                    | 0.760    | 0.761                        | 0.881                        | 971         | 224            | 1492           |
| 6    | -1.810    | 0.700  | 2.000 | -1.908              | 0.094                    | 1.000    | 0.851                        | 0.983                        | 908         | 160            | 1492           |
| 7    | 0.000     | 0.400  | 2.000 | 0.016               | 0.128                    | 0.049    | 0.722                        | 0.709                        | 1049        | 302            | 1493           |
| 8    | -0.600    | 0.400  | 2.000 | -0.624              | 0.173                    | 0.305    | 0.761                        | 0.885                        | 972         | 224            | 1491           |
| 9    | -1.810    | 0.400  | 2.000 | -1.943              | 0.321                    | 0.950    | 0.832                        | 0.979                        | 910         | 160            | 1494           |
| 1    | 0.000     | 1.000  | 2.000 | 0.001               | 0.002                    | 0.044    | 0.731                        | 0.731                        | 10491       | 3021           | 14926          |
| 2    | -0.600    | 1.000  | 2.000 | -0.599              | 0.002                    | 1.000    | 0.761                        | 0.880                        | 9732        | 2254           | 14926          |
| 3    | -1.810    | 1.000  | 2.000 | -1.814              | 0.004                    | 1.000    | 0.830                        | 0.979                        | 9094        | 1606           | 14920          |
| 4    | 0.000     | 0.700  | 2.000 | -0.001              | 0.004                    | 0.055    | 0.725                        | 0.726                        | 10492       | 3021           | 14926          |
| 5    | -0.600    | 0.700  | 2.000 | -0.601              | 0.005                    | 1.000    | 0.759                        | 0.880                        | 9731        | 2252           | 14926          |
| 6    | -1.810    | 0.700  | 2.000 | -1.869              | 0.009                    | 1.000    | 0.842                        | 0.982                        | 9092        | 1607           | 14923          |
| 7    | 0.000     | 0.400  | 2.000 | -0.001              | 0.011                    | 0.042    | 0.703                        | 0.703                        | 10490       | 3022           | 14919          |
| 8    | -0.600    | 0.400  | 2.000 | -0.604              | 0.015                    | 0.999    | 0.757                        | 0.879                        | 9731        | 2249           | 14918          |
| 9    | -1.810    | 0.400  | 2.000 | -1.878              | 0.032                    | 1.000    | 0.908                        | 0.990                        | 9091        | 1606           | 14929          |

\* value was truncated
